# Supplementary material for: Synthesis, characterization, antimicrobial and antibiofilm activity, and molecular docking analysis of NHC precursors and their Ag-NHC complexes
Source: Royal Society of Chemistry journal article supplement (doi:10.1039/d1dt02003j), 2021-01-01

| -#- | -ID Code- | Weight   | Carbon | Hydrogen | Nitrogen | Sulfur | ----- | -Time&Date-  |
|-----|-----------|----------|--------|----------|----------|--------|-------|--------------|
| 95  | NS-890    | 01 0.792 | 73.56  | 8.192    | 7.663    | 0.040  | ----- | 11:36 Sep-02 |
| 96  | NS-889    | 01 1.029 | 73.12  | 8.076    | 7.774    | 0.020  | ----- | 11:41 Sep-02 |
| 97  | NS-888    | 02 1.331 | 70.86  | 6.583    | 9.065    | 0.030  | ----- | 11:45 Sep-02 |
| 98  | NS-886    | 03 1.058 | 71.51  | 7.448    | 7.203    | 0.080  | ----- | 11:49 Sep-02 |
| 99  | NS-905    | 04 1.226 | 58.00  | 5.758    | 5.860    | 0.016  | ----- | 11:53 Sep-02 |
| 100 | NS-907    | 05 1.325 | 53.78  | 4.524    | 6.806    | 0.041  | ----- | 11:57 Sep-02 |
| 101 | NS-913    | 06 0.698 | 56.35  | 5.930    | 5.905    | 0.108  | ----- | 12:02 Sep-02 |
| 102 | NS-914    | 07 0.863 | 56.62  | 5.746    | 6.050    | -0.011 | ----- | 12:07 Sep-02 |

Dr. Öğr. Üyesi **Ali ERDOĞAN**  
İBTAM Müdür Yardımcısı

**İNÖNÜ ÜNİVERSİTESİ** A.C.  
**REKTÖRLÜĞÜ**  
Bilimsel ve Teknolojik Araştırma Merkezi

Bulent Durmaz



Supplement: d1dt02003j1.pdf [file d1dt02003j1.pdf]
